# Supplementary material for: Capsaicin Protects Cardiomyocytes against Anoxia/Reoxygenation Injury via Preventing Mitochondrial Dysfunction Mediated by SIRT1
Source: Hindawi journal article supplement (doi:10.1155/2017/1035702), 2017-01-01
Supplement: f1 [file 1035702.f1.doc]

**Capsaicin protects cardiomyocytes against Anoxia/Reoxygenation injury via preventing mitochondrial dysfunction mediated by SIRT1**

Huan He1,2, Yue Zhou2, Jiyi Huang2, Zelong Wu2, Zhangping Liao2, Dan Liu2, Dong Yin3,* and Ming He1,*

**Manuscript ID: 1035702.v1**

**Supplementary Materials**

Figure S1. Effects of Cap pretreatment with or without coadministration of sirtinol on cell viabilities and LDH and CPK activities in the culture medium after A/R. (A) The cell viabilities did not change using Cap alone (20 *µ*M), sirtinol alone (60 *µ*M), and Cap (20 *µ*M) + sirtinol (60 *µ*M) compared with the control group, as well as using sirtinol (60 *µ*M) + A/R compared with the A/R group. (B) LDH and CPK activities in the culture medium for the cardiomyocytes did not change using Cap alone (20 µM), sirtinol alone (60 *µ*M), and Cap (20 *µ*M) + sirtinol (60 *µ*M) compared with the control group, as well as using sirtinol (60 *µ*M) + A/R compared with the A/R group. Values were expressed as the mean ± SEM (*n* = 6). ▲▲*P* < 0.01 versus the control group.

Figure S2. Western blotting bands and graphic presentations of SIRT1 in the neonatal rat primary cardiomyocytes. Compared with the control group, A/R significantly downregulated the expression of SIRT1, regardless of whether with or without sirtinol. Pretreatment with Cap (20 *µ*M) significantly upregulated the expression of SIRT1, regardless of whether using Cap alone or Cap + sirtinol. Values were expressed as the mean ± SEM (*n* = 6). ▲▲*P* < 0.01 versus the control group.

**
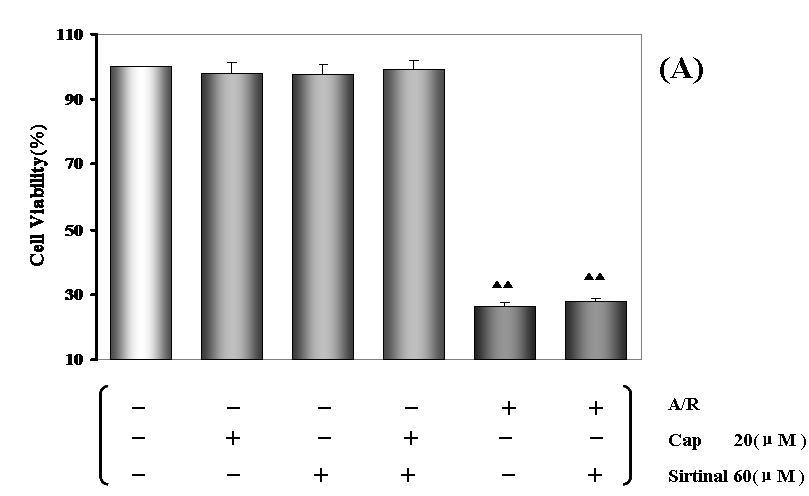
**

**
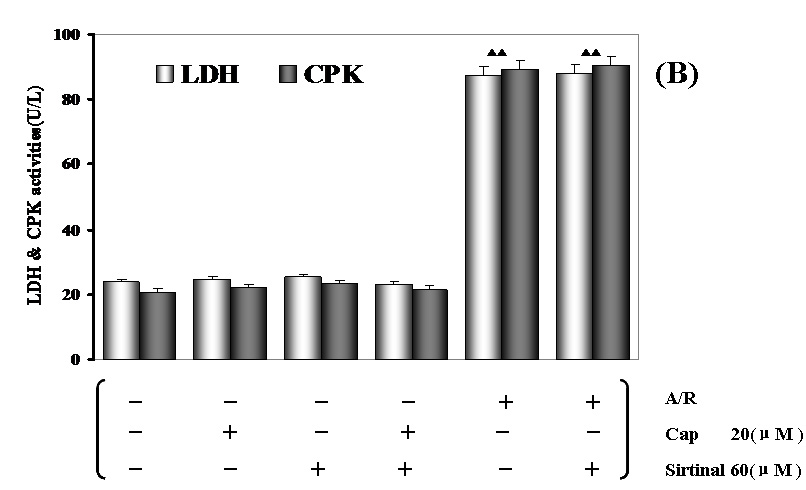
**

**Figure S1**

**
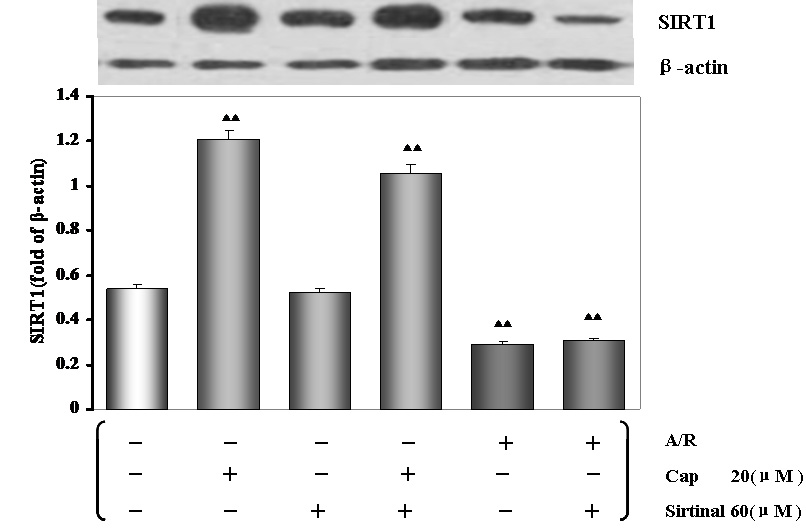
**

**Figure S2**
